# Supplementary material for: Interstitial lung disease in rheumatoid arthritis: incidence, prevalence and related drug prescriptions between 2007 and 2020
Source: PubMed Central journal article supplement — RMD Open. 2023 Jan 20;9(1):e002777. doi: 10.1136/rmdopen-2022-002777 (PMC9872506; doi:10.1136/rmdopen-2022-002777), 2023-01-20

| <b>Supplementary Table 1</b> International classification of diseases (ICD) 10, anatomical therapeutic chemical classification (ATC) codes and diagnostic procedure codes |                                                                |
|---------------------------------------------------------------------------------------------------------------------------------------------------------------------------|----------------------------------------------------------------|
| <b>Diagnoses</b>                                                                                                                                                          | <b>ICD-10 Codes</b>                                            |
| Rheumatoid arthritis                                                                                                                                                      | M05, M06                                                       |
| Interstitial lung disease                                                                                                                                                 | J84.1,8,9; M05.1+J99.0                                         |
| Hypertension                                                                                                                                                              | I10-13, I15                                                    |
| Ischaemic heart disease                                                                                                                                                   | I25                                                            |
| Pulmonary Hypertension                                                                                                                                                    | I27                                                            |
| Gastro-oesophageal reflux disease                                                                                                                                         | K21                                                            |
| COPD                                                                                                                                                                      | J44                                                            |
| Asthma bronchiale                                                                                                                                                         | J45                                                            |
| Diabetes mellitus                                                                                                                                                         | E10-E14                                                        |
| <b>Medication</b>                                                                                                                                                         | <b>ATC-Codes</b>                                               |
| NSAIDs                                                                                                                                                                    | M01A                                                           |
| Opioids                                                                                                                                                                   | N02A                                                           |
| Other Analgesics                                                                                                                                                          | N02B                                                           |
| Glucocorticoids                                                                                                                                                           | H02AB01-07 H02BX                                               |
| Methotrexate                                                                                                                                                              | L01BA01 L04AX03 M01CX01                                        |
| Leflunomide                                                                                                                                                               | L04AA13                                                        |
| Sulfasalazin                                                                                                                                                              | A07EC01, M01CX02                                               |
| Azathioprin                                                                                                                                                               | L04AX01                                                        |
| Ciclosporin                                                                                                                                                               | L04AD01, S01XA18                                               |
| Hydroxychloroquine                                                                                                                                                        | P01BA02 P01BA01                                                |
| Mycofenolat Mofetile                                                                                                                                                      | L04AA06                                                        |
| TNF-inhibitors                                                                                                                                                            | L04AB                                                          |
| Abatacept                                                                                                                                                                 | L04AA24                                                        |
| Rituximab                                                                                                                                                                 | L01XC02                                                        |
| Tocilizumab                                                                                                                                                               | L04AC07 (2020), L04AC07 (2021)                                 |
| Tofacitinib                                                                                                                                                               | L04AA29                                                        |
| Baricitinib                                                                                                                                                               | L04AA37                                                        |
| Filgotinib                                                                                                                                                                | L04AA45                                                        |
| Upadacitinib                                                                                                                                                              | L04AA44                                                        |
| Nintedanib                                                                                                                                                                | L01XE31 (2020), L01EX09 (2021)                                 |
| Pirfenidon                                                                                                                                                                | L04AX05                                                        |
| <b>Diagnostic procedures</b>                                                                                                                                              | <b>Charge number (only outpatient)</b>                         |
| HRCT scan                                                                                                                                                                 | 34330                                                          |
| Chest X-ray                                                                                                                                                               | 34240, 34241, 34242                                            |
| Spirometry                                                                                                                                                                | 03330, 27330,13255, 04330                                      |
|                                                                                                                                                                           | <b>Procedure codes</b>                                         |
| Pneumologic function tests                                                                                                                                                | 1-71                                                           |
| Biopsy                                                                                                                                                                    | 1-430, 1-431, 1-432                                            |
| Bronchoscopy                                                                                                                                                              | 1-620                                                          |
| <b>Specialist care</b>                                                                                                                                                    | <b>Specialist Number</b>                                       |
| Rheumatology                                                                                                                                                              | Number 31, Charge item 13690, 13691,13692, 13700, 13701, 99012 |
| Pulmonology                                                                                                                                                               | 30                                                             |

| <b>Supplementary Table 2</b> Prevalence and incidence of ILD in persons with RA (2007-2020) |       |       |       |       |       |       |       |       |       |       |       |       |       |       |
|---------------------------------------------------------------------------------------------|-------|-------|-------|-------|-------|-------|-------|-------|-------|-------|-------|-------|-------|-------|
|                                                                                             | 2007  | 2008  | 2009  | 2010  | 2011  | 2012  | 2013  | 2014  | 2015  | 2016  | 2017  | 2018  | 2019  | 2020  |
| <i>N (all persons with RA)</i>                                                              | 40686 | 40589 | 44415 | 48484 | 51678 | 54946 | 59134 | 63009 | 65882 | 68667 | 77895 | 80986 | 83721 | 85175 |
| <b>Prevalent ILD (%)</b>                                                                    |       |       |       |       |       |       |       |       |       |       |       |       |       |       |
| All                                                                                         | 0.7   | 1.6   | 1.9   | 2.1   | 2.2   | 2.2   | 2.2   | 2.1   | 2.1   | 2.1   | 2.0   | 1.9   | 1.8   | 1.7   |
| M05                                                                                         | 1.0   | 2.1   | 2.6   | 2.9   | 2.9   | 3.0   | 2.9   | 2.8   | 2.8   | 2.9   | 2.7   | 2.6   | 2.5   | 2.3   |
| M06                                                                                         | 0.6   | 1.3   | 1.6   | 1.8   | 1.9   | 1.8   | 1.8   | 1.8   | 1.8   | 1.8   | 1.6   | 1.5   | 1.5   | 1.4   |
| Male                                                                                        | 1.2   | 2.5   | 3.1   | 3.4   | 3.3   | 3.3   | 3.4   | 3.2   | 3.2   | 3.3   | 2.9   | 2.8   | 2.5   | 2.4   |
| Female                                                                                      | 0.6   | 1.3   | 1.6   | 1.8   | 1.9   | 1.9   | 1.9   | 1.9   | 1.9   | 1.8   | 1.7   | 1.7   | 1.6   | 1.6   |
| Age 31-50                                                                                   | 0.4   | 0.7   | 0.7   | 1.0   | 1.0   | 0.8   | 0.7   | 0.6   | 0.6   | 0.5   | 0.6   | 0.5   | 0.5   | 0.4   |
| 51-70                                                                                       | 0.7   | 1.7   | 2.1   | 2.3   | 2.3   | 2.2   | 2.1   | 2.0   | 1.9   | 1.9   | 1.8   | 1.7   | 1.6   | 1.4   |
| >70                                                                                         | 0.9   | 2.0   | 2.3   | 2.6   | 2.8   | 2.8   | 3.0   | 2.9   | 2.9   | 2.9   | 2.8   | 2.6   | 2.6   | 2.4   |
| <b>Incident ILD (%)</b>                                                                     |       |       |       |       |       |       |       |       |       |       |       |       |       |       |
| All                                                                                         | 0.04  | 0.16  | 0.19  | 0.18  | 0.18  | 0.13  | 0.21  | 0.19  | 0.17  | 0.18  | 0.20  | 0.17  | 0.17  | 0.11  |
| M05                                                                                         | 0.07  | 0.22  | 0.24  | 0.22  | 0.26  | 0.18  | 0.26  | 0.26  | 0.21  | 0.26  | 0.30  | 0.25  | 0.24  | 0.17  |
| M06                                                                                         | 0.03  | 0.12  | 0.16  | 0.16  | 0.15  | 0.11  | 0.19  | 0.16  | 0.16  | 0.15  | 0.15  | 0.13  | 0.14  | 0.07  |
| Male                                                                                        | 0.05  | 0.25  | 0.25  | 0.30  | 0.29  | 0.15  | 0.36  | 0.32  | 0.31  | 0.23  | 0.33  | 0.36  | 0.26  | 0.16  |
| Female                                                                                      | 0.04  | 0.13  | 0.17  | 0.15  | 0.15  | 0.12  | 0.17  | 0.16  | 0.14  | 0.17  | 0.16  | 0.12  | 0.15  | 0.09  |
| Age 31-50                                                                                   | 0.07  | 0.03  | 0.08  | 0.11  | 0.09  | 0.03  | 0.04  | 0.06  | 0.02  | 0.01  | 0.08  | 0.02  | 0.05  | 0.05  |
| 51-70                                                                                       | 0.03  | 0.17  | 0.19  | 0.17  | 0.19  | 0.15  | 0.20  | 0.17  | 0.16  | 0.18  | 0.15  | 0.18  | 0.14  | 0.09  |
| >70                                                                                         | 0.06  | 0.22  | 0.23  | 0.25  | 0.23  | 0.15  | 0.29  | 0.27  | 0.24  | 0.24  | 0.31  | 0.21  | 0.25  | 0.14  |

| <b>Supplementary Table 3</b> Proportion of persons with RA and at least one DMARD prescription but without ILD (%) with drug treatment 2007-2020 |              |              |              |              |              |              |              |              |              |              |              |              |              |              |
|--------------------------------------------------------------------------------------------------------------------------------------------------|--------------|--------------|--------------|--------------|--------------|--------------|--------------|--------------|--------------|--------------|--------------|--------------|--------------|--------------|
|                                                                                                                                                  | 2007         | 2008         | 2009         | 2010         | 2011         | 2012         | 2013         | 2014         | 2015         | 2016         | 2017         | 2018         | 2019         | 2020         |
| <i>N</i>                                                                                                                                         | 35717        | 39521        | 43264        | 47236        | 50412        | 53645        | 57793        | 61607        | 64458        | 67229        | 76354        | 79465        | 82220        | 83737        |
| Glucocorticoids                                                                                                                                  | 61           | 61           | 61           | 60           | 60           | 59           | 59           | 59           | 58           | 57           | 56           | 55           | 53           | 51           |
| DDD <sub>s</sub> , mean (SD)                                                                                                                     | 179<br>(133) | 180<br>(168) | 176<br>(134) | 176<br>(134) | 173<br>(129) | 167<br>(128) | 170<br>(129) | 169<br>(128) | 166<br>(126) | 163<br>(127) | 160<br>(126) | 158<br>(125) | 155<br>(125) | 156<br>(127) |
| Any csDMARD                                                                                                                                      | 83           | 79           | 77           | 74           | 72           | 70           | 68           | 67           | 66           | 64           | 65           | 62           | 60           | 59           |
| Methotrexate                                                                                                                                     | 57           | 55           | 54           | 51           | 50           | 49           | 49           | 48           | 47           | 46           | 47           | 45           | 44           | 43           |
| Leflunomide                                                                                                                                      | 14           | 14           | 14           | 14           | 13           | 12           | 12           | 11           | 11           | 11           | 11           | 10           | 9            | 9            |
| HCQ                                                                                                                                              | 10           | 10           | 9            | 9            | 8            | 8            | 8            | 8            | 8            | 8            | 8            | 7            | 7            | 7            |
| Mycophenolate                                                                                                                                    | 0.3          | 0.3          | 0.3          | 0.3          | 0.3          | 0.3          | 0.2          | 0.2          | 0.2          | 0.2          | 0.2          | 0.2          | 0.2          | 0.2          |
| Sulfasalazin                                                                                                                                     | 1.0          | 0.8          | 0.6          | 0.6          | 0.5          | 0.4          | 0.3          | 0.3          | 0.3          | 0.2          | 0.3          | 0.3          | 0.5          | 0.4          |
| Any bDMARD                                                                                                                                       | 10           | 11           | 11           | 12           | 13           | 13           | 13           | 14           | 14           | 15           | 17           | 17           | 17           | 17           |
| TNF inhibitor                                                                                                                                    | 9            | 10           | 10           | 11           | 11           | 11           | 11           | 11           | 11           | 11           | 12           | 12           | 12           | 12           |
| Abatacept                                                                                                                                        | 0.2          | 0.3          | 0.4          | 0.4          | 0.5          | 0.7          | 1.1          | 1.1          | 1.2          | 1.4          | 1.5          | 1.4          | 1.4          | 1.4          |
| Rituximab                                                                                                                                        | 0.3          | 0.5          | 0.6          | 0.7          | 0.7          | 0.8          | 0.8          | 0.8          | 0.8          | 0.7          | 0.8          | 0.7          | 0.7          | 0.6          |
| Tocilizumab                                                                                                                                      | 0.0          | 0.0          | 0.5          | 0.7          | 0.8          | 1.0          | 1.1          | 1.6          | 1.9          | 2.1          | 2.2          | 2.1          | 1.9          | 1.9          |
| JAK inhibitor                                                                                                                                    | -            | -            | -            | -            | -            | -            | -            | -            | -            | -            | 1.2          | 2.9          | 4.0          | 4.9          |
| cs+bDMARD                                                                                                                                        | 6            | 7            | 7            | 7            | 8            | 8            | 8            | 8            | 8            | 8            | 9            | 8            | 8            | 8            |
| NSAIDs                                                                                                                                           | 62           | 61           | 59           | 58           | 57           | 55           | 55           | 53           | 52           | 51           | 49           | 48           | 47           | 45           |
| Analgesics                                                                                                                                       | 20           | 22           | 23           | 24           | 24           | 25           | 27           | 28           | 29           | 30           | 32           | 32           | 33           | 33           |
| Opioids                                                                                                                                          | 23           | 22           | 22           | 22           | 21           | 21           | 20           | 21           | 21           | 21           | 21           | 21           | 21           | 20           |

cs/bDMARD conventional synthetic/biologic disease-modifying antirheumatic drug, DDD defined daily dose of persons with a glucocorticoid prescription, HCQ Hydroxychloroquine, JAK Januskinase, NSAIDs, nonsteroidal antirheumatic drugs, SD standard deviation, TNF Tumor necrosis factor

**Supplementary figure 1** Inclusion requirements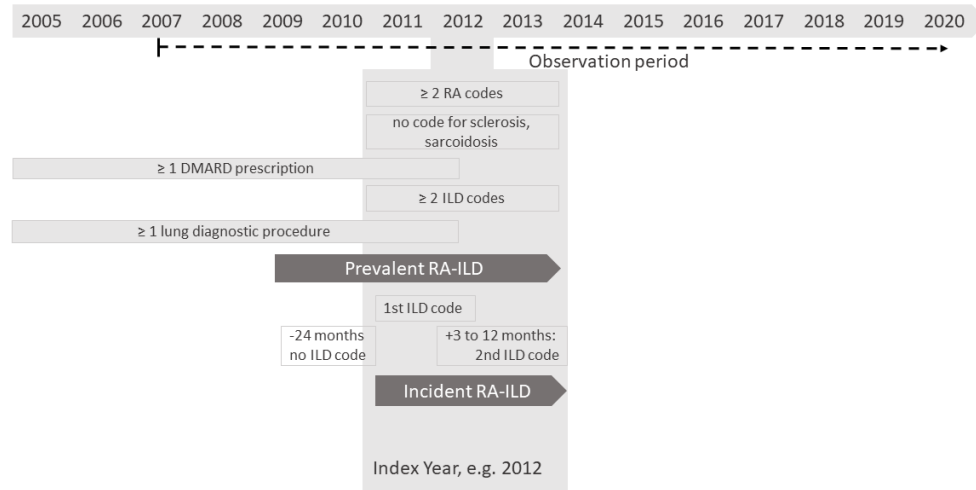

Supplement: rmdopen-2022-002777supp001.pdf [file rmdopen-2022-002777supp001.pdf]
